# Supplementary material for: [NO3⊂{(en)Pt(2,2′-bpz)}3]NO3(SO4)2: Snapshot of nitrate insertion into a cationic Pt3 metallacycle or simply a packing effect?
Source: Royal Society of Chemistry journal article supplement (doi:10.1039/c0dt00463d), 2010-01-01
Supplement: c0dt00463d.pdf [file c0dt00463d.pdf]

## SUPPORTING INFORMATION

### $[\text{NO}_3\text{C}\{(\text{en})\text{Pt}(2,2'\text{-bpz})\}_3]\text{NO}_3(\text{SO}_4)_2$ : Snapshot of nitrate insertion into a cationic $\text{Pt}_3$ metallacycle or simply a packing effect?

*Anzhela Galstyan, Pablo J. Sanz Miguel\* and Bernhard Lippert\**

Technische Universität Dortmund, 44221 Dortmund (Germany), Fax: (+49) 231-755-3797

E-mail: pablo.sanz@tu-dortmund.de; bernhard.lippert@tu-dortmund.de

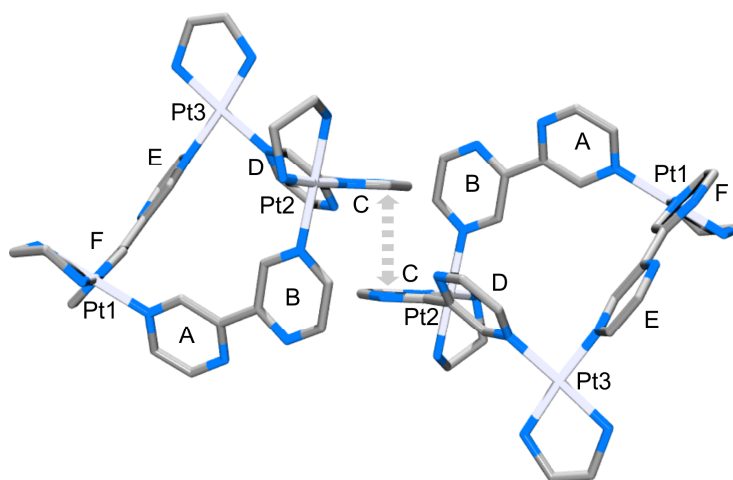

**Figure S11:** Detail of the  $\pi$ - $\pi$  staking (C-rings, 3.3 Å) connecting both cations of **3** within the unit cell. Water molecules and counter anions were omitted for clarity.

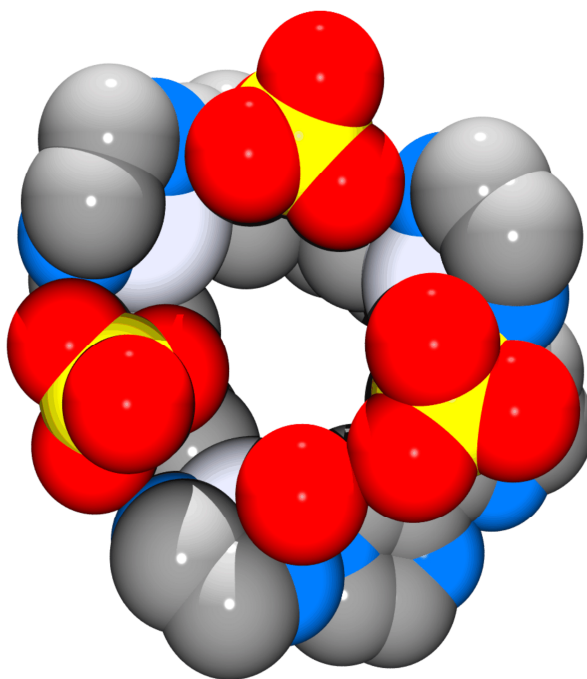

**Figure SI2:** Lower view (space filling) of the cation **3** with detail of binding of three sulfate anions and a water molecule in its basis.

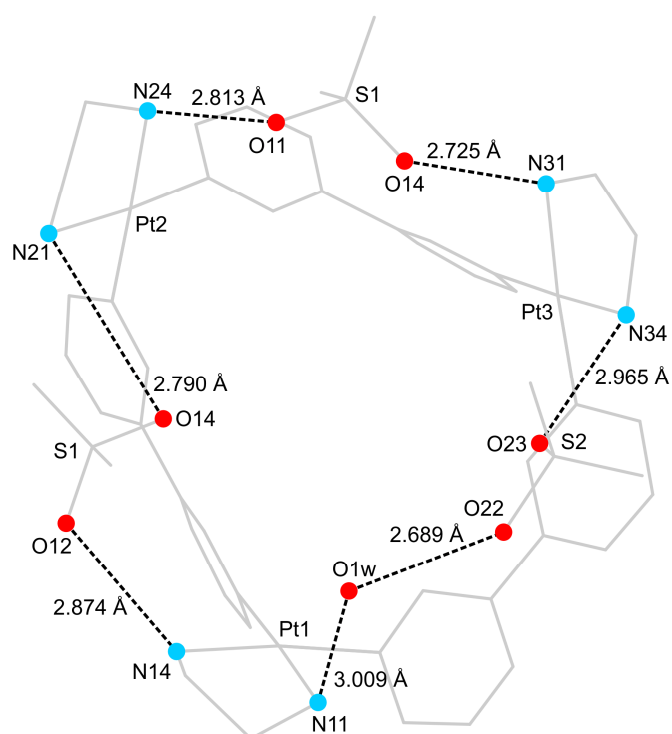

**Figure SI3:** Schematic representation of hydrogen bonding involving the sulfate anions inserted between enPt<sup>II</sup> entities in **3**.

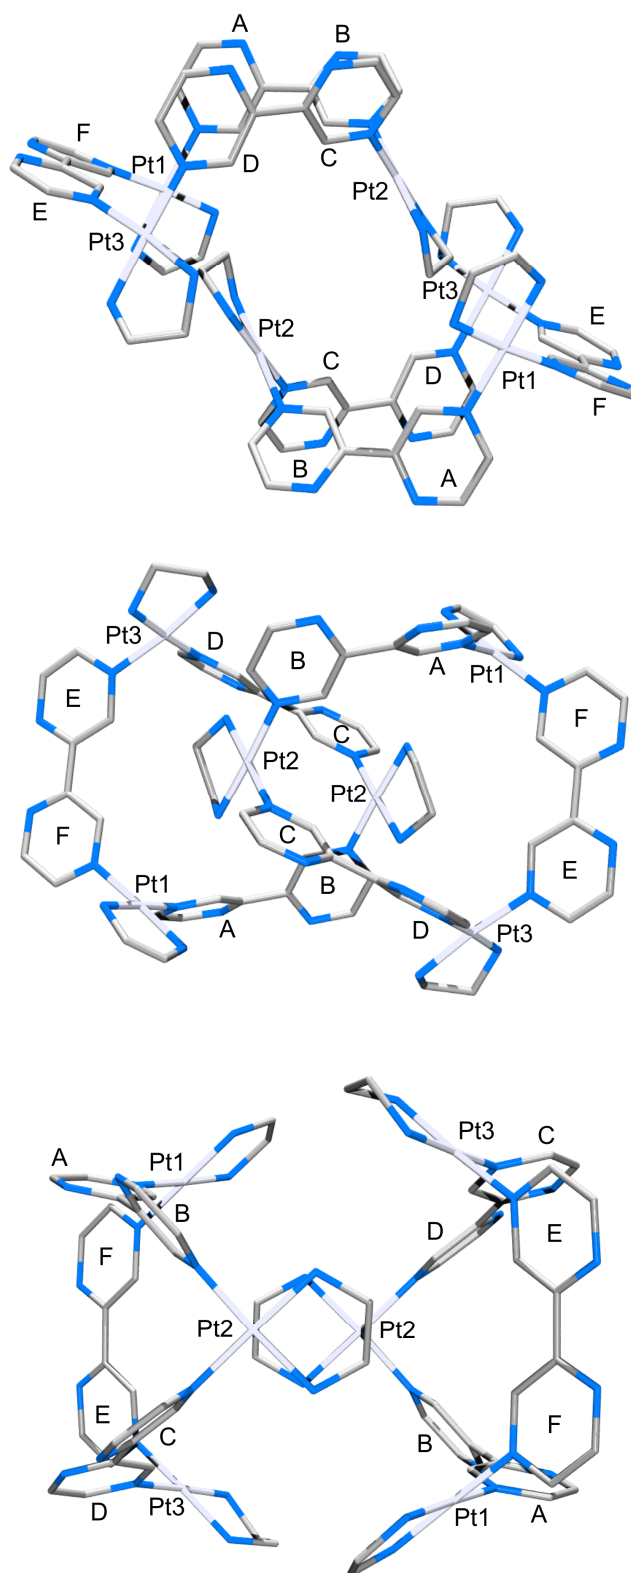

**Figure SI4:** Three different views of the mutual interaction between two cations of **3**.

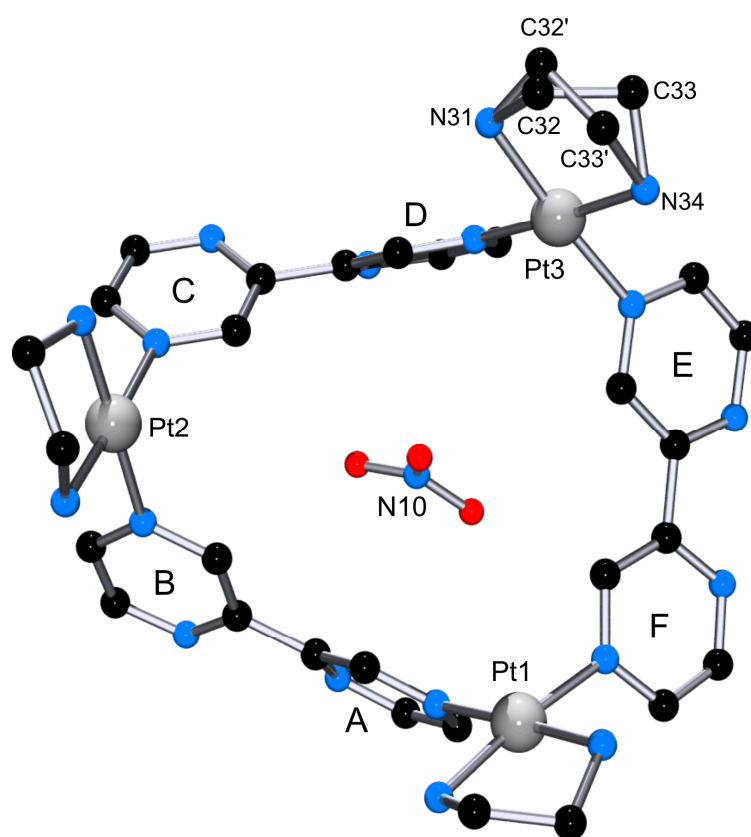

**Figure SI-5:** Views of cations **3** showing the two different conformations ( $\delta$  and  $\lambda$  pucker) of the ethylenediamine ring at Pt3.

Table SI-1: Selected bond distances (Å) and angles (°) for compound **3**.

|                   |                       |                                                 |
|-------------------|-----------------------|-------------------------------------------------|
| Pt1-N11, 2.008(7) | N11-Pt1-N14, 84.1(3)  | Pt1N <sub>4</sub> / Pt <sub>3</sub> plane, 64.8 |
| Pt1-N14, 2.021(6) | N11-Pt1-N4A, 177.6(3) | Pt2N <sub>4</sub> / Pt <sub>3</sub> plane, 67.9 |
| Pt2-N21, 2.018(7) | N14-Pt1-N4A, 93.6(3)  | Pt3N <sub>4</sub> / Pt <sub>3</sub> plane, 65.5 |
| Pt2-N24, 2.017(6) | N11-Pt1-N4F, 91.2(3)  | Pt1...Pt2, 7.9600(5)                            |
| Pt3-N31, 2.034(7) | N14-Pt1-N4F, 173.8(3) | Pt2...Pt3, 7.9112(5)                            |
| Pt3-N34, 2.030(8) | N4A-Pt1-N4F, 91.2(3)  | Pt3...Pt1, 7.886(5)                             |
| Pt1-N4A, 2.024(7) | N4C-Pt2-N21, 176.5(2) | N1a...N1d, 6.827(11)                            |
| Pt1-N4F, 2.039(6) | N4C-Pt2-N24, 92.4(2)  | N1b...N1c, 6.440(10)                            |
| Pt2-N4B, 2.022(6) | N21-Pt2-N24, 84.1(3)  | N1a...N1b, 2.726(10)                            |
| Pt2-N4C, 2.012(6) | N4C-Pt2-N4B, 88.7(2)  | N1c...N1d, 2.842(10)                            |
| Pt3-N4D, 2.029(7) | N21-Pt2-N4B, 94.8(3)  | N1e...N1f, 2.694(10)                            |
| Pt3-N4E, 2.018(7) | N24-Pt2-N4B, 178.9(3) | N(A) / N(B), 26.2                               |
|                   | N4E-Pt3-N4D, 90.9(3)  | N(C) / N(D), 42.4                               |
|                   | N4E-Pt3-N34, 91.3(3)  | N(E) / N(F), 9.0                                |
|                   | N4D-Pt3-N34, 177.7(3) |                                                 |
|                   | N4E-Pt3-N31, 175.5(3) |                                                 |
|                   | N4D-Pt3-N31, 93.4(3)  |                                                 |
|                   | N34-Pt3-N31, 84.4(3)  |                                                 |

Table SI-2: Hydrogen bonding distances (Å) for compound **3**.

---

|                                          |                                        |
|------------------------------------------|----------------------------------------|
| N11...O6w[x, y, z+1], 2.920(10)          | O2w...O41, 2.895(16)                   |
| N11...O1w[-x+2, -y+1, -z+1], 3.010(9)    | O3w...O12, 2.786 (10)                  |
| N11...O7w[x, y, z+1], 3.081(13)          | O4w...N1a[-x+1, -y+1, -z+1], 2.935(10) |
| N14...O12[-x+2, -y+1, -z+1], 2.874(9)    | O4w...O3w[-x+2, -y, -z+1], 2.746(12)   |
| N14...O2w[x, y+1, z], 2.948(9)           | O4w...O2w, 2.786(11)                   |
| N21...O23, 3.210(15)                     | O4w...O5w, 2.874(13)                   |
| N21...O14[-x+2, -y+1, -z+1], 2.790(10)   | O5w...O32[-x+1, -y+1, -z+1], 2.977(12) |
| N24...O11, 2.812(9)                      | O6w...O21, 2.699(15)                   |
| N24...O1w, 2.881(9)                      | O8w...O23[-x+2, -y+1, -z], 3.057(18)   |
| N31...O41, 3.009(16)                     | O9w...O13w, 3.01(2)                    |
| N31...O14, 2.725(10)                     | O10w...O6w, 2.806(18)                  |
| N34...O23 [-x+2, -y+1, -z+1], 2.965(16)  | O10w...O8w[-x+2, -y+1, -z], 2.800(18)  |
| N34...O10w [-x+2, -y+1, -z+1], 2.867(13) | O11w...O24, 2.555(17)                  |
| O1w...O22, 2.689(13)                     | O11w...O43[-x+1, -y+1, -z+1], 2.66(2)  |
| O1w...O5w, 2.789(9)                      | O12w...O42, 2.54(3)                    |
| O2w...O13, 2.667(10)                     | O12w...O11w[x, y-1, z+1], 2.91(2)      |

---
